# Supplementary material for: Role of Circulating Tumor Cells (CTC), Androgen Receptor Full Length (AR-FL) and Androgen Receptor Splice Variant 7 (AR-V7) in a Prospective Cohort of Castration-Resistant Metastatic Prostate Cancer Patients
Source: PubMed Central journal article supplement (PMC6770005; doi:10.3390/cancers11091365), 2019-09-13

# Supplementary Materials: Role of Circulating Tumor Cells (CTC), Androgen Receptor Full Length (AR-FL) and Androgen Receptor Splice Variant 7 (AR-V7) in a Prospective Cohort of Castration-Resistant Metastatic Prostate Cancer Patients.

Carlo Cattrini, Alessandra Rubagotti, Linda Zinoli, Luigi Cerbone, Elisa Zanardi, Matteo Capaia, Paola Barboro and Francesco Boccardo

**Table S1.** Patient Characteristics according to Treatment Line at Study Entry (1L vs >2L).

| Variable                           | 1L (n = 24)         | >2L (n = 15)         |
|------------------------------------|---------------------|----------------------|
| Age                                |                     |                      |
| Median (range), years              | 75.5 (56–84)        | 70.0 (58–84)         |
| PSA                                |                     |                      |
| Median (range), ng/mL              | 13.36 (0.33–564.90) | 90.47 (3.99–4688.00) |
| LDH                                |                     |                      |
| Median (range), U/L                | 220 (138–628)       | 229 (121–1616)       |
| Treatment at AR-V7 sample $\Delta$ |                     |                      |
| ARSi Therapy                       | 20 (83.3%)          | 5 (33.3%)            |
| Cabazitaxel/Docetaxel              | 4 (16.7%)           | 6 (40.0%)            |
| Other                              | -                   | 4 (26.7%)            |
| Bone metastases                    |                     |                      |
| Absent                             | 7 (29.2%)           | 1 (6.7%)             |
| Present                            | 17 (70.8%)          | 14 (93.3%)           |
| Visceral metastases                |                     |                      |
| Absent                             | 21 (87.5%)          | 11 (73.3%)           |
| Present                            | 3 (12.5%)           | 4 (26.7%)            |
| Number of metastatic sites         |                     |                      |
| =1 site                            | 14 (58.3%)          | 7 (46.7%)            |
| >1 sites                           | 10 (41.7%)          | 8 (53.3%)            |

$\Delta$  ARSi therapy= Androgen-Receptor Signaling inhibitors (abiraterone acetate, enzalutamide); Other= cyclophosphamide, mitoxantrone, vinorelbine.

**Table S2.** Univariate Analysis.

| Variable                   | HR (95% CI)         | p $\leq$ |
|----------------------------|---------------------|----------|
| Age, years                 |                     |          |
| $\leq 72$                  | 1                   |          |
| $> 72$                     | 1.21 (0.39–3.77)    | 0.7      |
| PSA (ng/mL)                |                     |          |
| $< 35$ ng/mL               | 1                   |          |
| $\geq 35$ ng/mL            | 19.77 (2.43–160.53) | 0.005    |
| LDH, U/L                   |                     |          |
| $\leq 225$ U/L             | 1                   |          |
| $> 225$ U/L                | 2.02 (0.59–6.89)    | 0.2      |
| Treatment line*            |                     |          |
| 1L                         | 1                   |          |
| >2L                        | 7.41 (1.94–28.24)   | 0.003    |
| Bone metastases            |                     |          |
| Absent                     | 1                   |          |
| Present                    | 3.64 (0.47–28.35)   | 0.2      |
| Visceral metastases        |                     |          |
| Absent                     | 1                   |          |
| Present                    | 1.73 (0.46–6.42)    | 0.4      |
| Number of metastatic sites |                     |          |
| =1 site                    | 1                   |          |
| >1 sites                   | 4.71 (1.26–17.57)   | 0.02     |
| AR_V7                      |                     |          |
| Negative                   | 1                   |          |

|                |                    |       |
|----------------|--------------------|-------|
| Positive CTC   | 20.31 (5.54–74.48) | 0.000 |
| Negative CTC   | 1                  |       |
| Positive AR-FL | 7.40 (1.53–35.82)  | 0.01  |
| Negative AR-FL | 1                  | 0.002 |
| <10 copies/mL  | 4.45 (0.88–22.39)  | 0.07  |
| ≥10 copies/mL  | 13.52 (3.11–58.85) | 0.001 |

\*1L = First-line therapy for metastatic castration-resistant prostate cancer (mCRPC); >2L = Third-line or more for mCRPC. Δ ARSi therapy = Androgen-Receptor Signaling inhibitors (abiraterone acetate, enzalutamide); Other = cyclophosphamide, mitoxantrone, vinorelbine.

**Table S3.** Results of Biomarkers' Analysis for Each Patient Included in the Study.

| Treatment Line | PSA    | LDH  | CTC | PSMA | PSA | AR-V7            | AR-FL             | ARV7/ARFL Ratio | PSA50 |
|----------------|--------|------|-----|------|-----|------------------|-------------------|-----------------|-------|
| 1L             | 8.1    | 237  | POS | NEG  | NEG | NEG              | POS (<10 cp/mL)   |                 | YES   |
| 1L             | 30.8   | 218  | NEG | NEG  | NEG | NEG              | NEG               |                 | NO    |
| 1L             | 13.5   | NA   | NEG | NEG  | NEG | NEG              | NEG               |                 | YES   |
| 1L             | 141.5  | 138  | NEG | NEG  | NEG | NEG              | NEG               |                 | YES   |
| 1L             | 564.9  | 172  | POS | NEG  | POS | NEG              | NEG               |                 | YES   |
| 1L             | 13.2   | 214  | NEG | NEG  | NEG | NEG              | NEG               |                 | YES   |
| 1L             | 2.9    | 188  | NEG | NEG  | NEG | NEG              | NEG               |                 | YES   |
| 1L             | 12.8   | 199  | NEG | NEG  | NEG | NEG              | NEG               |                 | YES   |
| 1L             | 10.8   | 207  | NEG | NEG  | NEG | NEG              | NEG               |                 | YES   |
| 1L             | 35.2   | 216  | POS | NEG  | POS | POS (29.4 cp/mL) | POS (330.0 cp/mL) | 8.9%            | NO    |
| 1L             | 97.7   | 249  | POS | NEG  | NEG | NEG              | POS (85.0 cp/mL)  |                 | YES   |
| 1L             | 7.6    | 234  | NEG | NEG  | NEG | NEG              | NEG               |                 | YES   |
| 1L             | 29.9   | 301  | NEG | NEG  | NEG | NEG              | NEG               |                 | YES   |
| 1L             | 3.1    | 203  | NEG | NEG  | NEG | NEG              | NEG               |                 | YES   |
| 1L             | 87.8   | 248  | POS | NEG  | POS | NEG              | NEG               |                 | YES   |
| 1L             | 51.5   | 170  | POS | NEG  | NEG | NEG              | POS (<10 cp/mL)   |                 | YES   |
| 1L             | 6.9    | 203  | NEG | NEG  | NEG | NEG              | NEG               |                 | YES   |
| 1L             | 9.0    | 230  | NEG | NEG  | NEG | NEG              | NEG               |                 | YES   |
| 1L             | 0.3    | 220  | POS | NEG  | NEG | NEG              | POS (<10 cp/mL)   |                 | YES   |
| 1L             | 25.6   | 228  | NEG | NEG  | NEG | NEG              | NEG               |                 | NO    |
| 1L             | 7.3    | 235  | NEG | NEG  | NEG | NEG              | NEG               |                 | YES   |
| 1L             | 47.9   | 241  | POS | NEG  | POS | NEG              | NEG               |                 | YES   |
| 1L             | 140.0  | 628  | POS | POS  | POS | POS (<10 cp/mL)  | POS (29.8 cp/mL)  |                 | NO    |
| 1L             | 3.6    | 234  | POS | POS  | POS | NEG              | NEG               |                 | NO    |
| >2L            | 514.0  | 229  | POS | NEG  | POS | POS (17.2 cp/mL) | POS (46.7 cp/mL)  | 36.8%           | YES   |
| >2L            | 4.0    | 208  | NEG | NEG  | NEG | NEG              | NEG               |                 | YES   |
| >2L            | 59.5   | NA   | NEG | NEG  | NEG | NEG              | NEG               |                 | YES   |
| >2L            | 24.2   | 152  | POS | NEG  | NEG | NEG              | POS (<10 cp/mL)   |                 | NO    |
| >2L            | 550.2  | 339  | POS | NEG  | NEG | NEG              | POS (18.0 cp/mL)  |                 | YES   |
| >2L            | 6.0    | 275  | NEG | NEG  | NEG | NEG              | NEG               |                 | NO    |
| >2L            | 516.9  | 228  | NEG | NEG  | NEG | NEG              | NEG               |                 | NO    |
| >2L            | 1036.0 | 839  | POS | POS  | NEG | POS (<10 cp/mL)  | POS (33.9 cp/mL)  |                 | NO    |
| >2L            | 4688.0 | 452  | POS | POS  | POS | POS (11.6 cp/mL) | POS (17.8 cp/mL)  | 65.2%           | NO    |
| >2L            | 67.0   | 271  | POS | POS  | POS | NEG              | POS (<10 cp/mL)   |                 | NO    |
| >2L            | 78.1   | 121  | POS | POS  | POS | POS (<10 cp/mL)  | POS (<10 cp/mL)   |                 | NO    |
| >2L            | 97.9   | NA   | POS | POS  | POS | NEG              | POS (<10 cp/mL)   |                 | NO    |
| >2L            | 958.6  | 1616 | POS | POS  | POS | POS (257 cp/mL)  | POS (193.0 cp/mL) | 133.2%          | NO    |
| >2L            | 60.9   | 213  | POS | POS  | POS | NEG              | NEG               |                 | NO    |
| >2L            | 90.5   | 186  | POS | POS  | POS | NEG              | NEG               |                 | NO    |

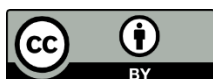

Supplement: cancers-11-01365-s001.pdf [file cancers-11-01365-s001.pdf]
